# Supplementary material
Source: MDPI journal article supplement (https://www.mdpi.com/2673-4591/9/1/43)
Supplement: s1 [file s1]

**Table S1.** Characteristics of production systems evaluated for 2017 [15].

| Crop | #id   | Region    | Tillage      | Yield<br>t ha <sup>-1</sup> | Irrigation System |                     | Cash Cost<br>USD t <sup>-1</sup> | Oper. Cost<br>USD ha <sup>-1</sup> |
|------|-------|-----------|--------------|-----------------------------|-------------------|---------------------|----------------------------------|------------------------------------|
|      |       |           |              |                             | Type              | mm ha <sup>-1</sup> |                                  |                                    |
| Corn | 17#15 | n/a       | Conventional | 5.3                         |                   |                     | 122.0                            | 681.5                              |
| Corn | 17#16 | East      | Conventional | 8.5                         |                   |                     | 98.8                             | 786.4                              |
| Corn | 17#17 | n/a       | No-till      | 7.2                         |                   |                     | 96.9                             | 685.1                              |
| Corn | 17#18 | East      | No-till      | 10.0                        |                   |                     | 85.4                             | 777.1                              |
| Corn | 17#19 | n/a       | No-till      | 7.5                         |                   |                     | 91.7                             | 679.6                              |
| Corn | 17#20 | East      | No-till      | 10.4                        |                   |                     | 87.8                             | 828.7                              |
| Corn | 17#21 | n/a       | No-till      | 7.8                         |                   |                     | 85.0                             | 657.5                              |
| Corn | 17#22 | East      | No-till      | 10.7                        |                   |                     | 80.3                             | 782.1                              |
| Corn | 17#23 | n/a       | Ecofallow    | 7.2                         |                   |                     | 92.5                             | 699.2                              |
| Corn | 17#24 | n/a       | Ridge        | 13.5                        | Gravity           | 185                 | 90.6                             | 1203.1                             |
| Corn | 17#25 | n/a       | Ridge        | 14.1                        | Gravity           | 185                 | 95.7                             | 1339.1                             |
| Corn | 17#26 | Panhandle |              | 11.3                        | Canal             | 154                 | 100.8                            | 1259.6                             |
| Corn | 17#27 | n/a       | No-till      | 14.1                        | Pivot D           | 92                  | 93.7                             | 1258.7                             |
| Corn | 17#28 | n/a       | No-till      | 14.7                        | Pivot D           | 92                  | 97.2                             | 1362.0                             |
| Corn | 17#29 | n/a       | -            | 13.5                        | Pivot D           | 134                 | 100.4                            | 1339.5                             |
| Corn | 17#30 | Panhandle | -            | 11.3                        | Pivot E           | 134                 | 116.1                            | 1463.8                             |
| Corn | 17#31 | n/a       | Continuous   | 14.1                        | Pivot D           | 134                 | 105.1                            | 1469.3                             |

#id = original scenario identification [15], n/a = non-available; D = diesel; E = electricity; Oper. Cost = Total Operating and Use Related Ownership Costs.

**Table S2.** Cost of some agricultural inputs [15].

| Input                    | Unit                  | 2017   |
|--------------------------|-----------------------|--------|
| Diesel oil               | USD L <sup>-1</sup>   | 0.59   |
| Electricity              | USD kWh <sup>-1</sup> | 0.11   |
| 28-0-0                   | USD L <sup>-1</sup>   | 0.34   |
| 10-34-0-1Z               | USD L <sup>-1</sup>   | 0.65   |
| 82-0-0                   | USD kg <sup>-1</sup>  | 0.62   |
| 2,4-D Amine              | USD L <sup>-1</sup>   | 3.70   |
| 2,4-D Ester 4            | USD L <sup>-1</sup>   | 4.76   |
| Glyphosate +Surf         | USD L <sup>-1</sup>   | 3.30   |
| Brigade® 2EC             | USD L <sup>-1</sup>   | 38.31  |
| Lorsban® 15 G            | USD kg <sup>-1</sup>  | 5.84   |
| Mustang® Max EC          | USD L <sup>-1</sup>   | 50.20  |
| Regent® 4 SC             | USD L <sup>-1</sup>   | 335.59 |
| Corn seeds Conventional  | USD bag <sup>-1</sup> | 200.00 |
| Corn seeds Bt, ECB       | USD bag <sup>-1</sup> | 230.00 |
| Corn seed Bt, ECB and RW | USD bag <sup>-1</sup> | 230.00 |
